# Supplementary material
Source: Springer Nature journal article supplement (https://www.springermedizin.de/resource/supplementary/13014_2013_1167_MOESM5_ESM.pdf/9635048)

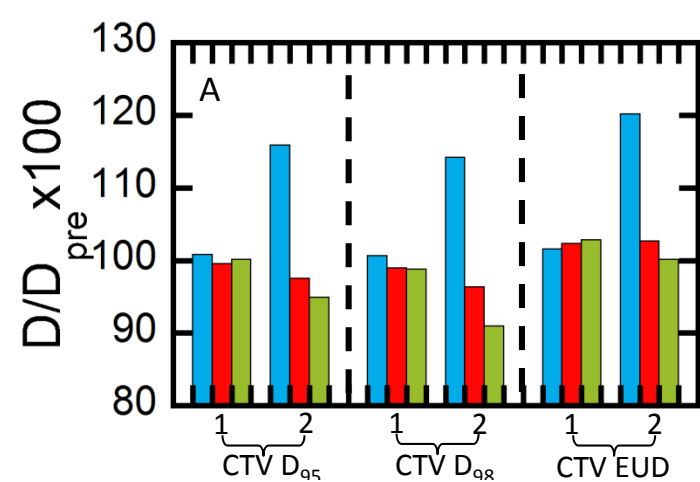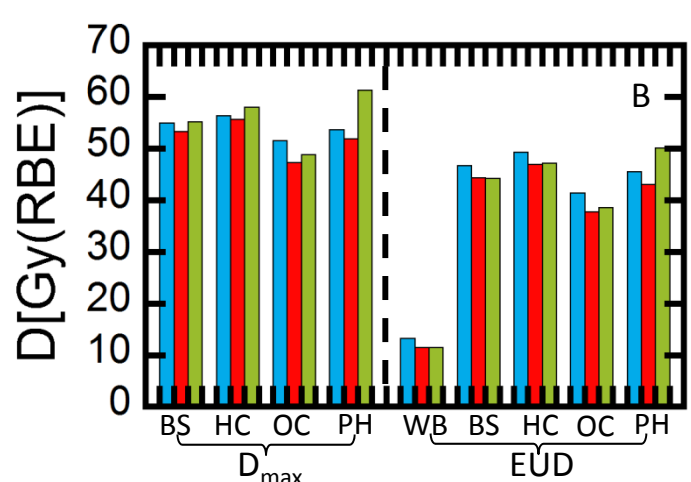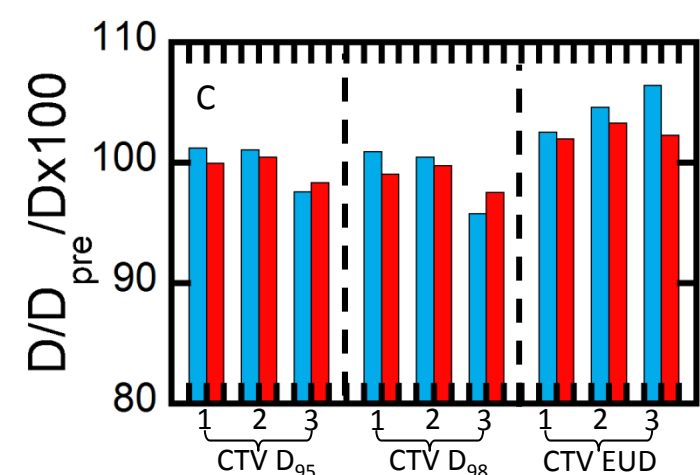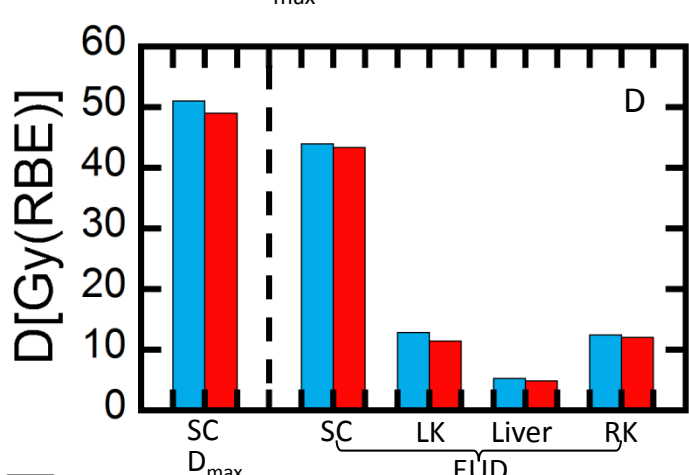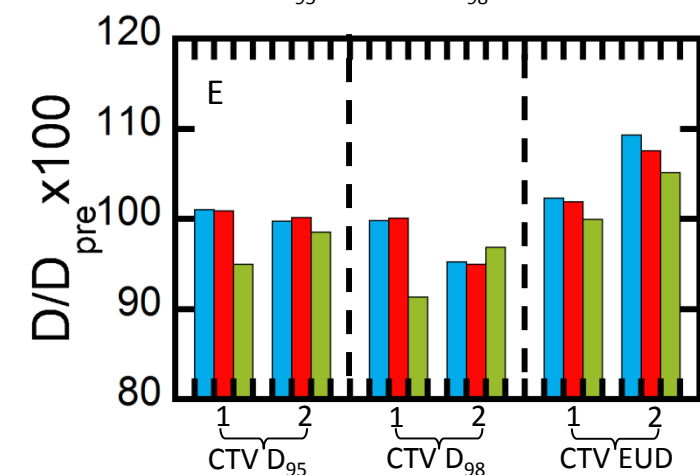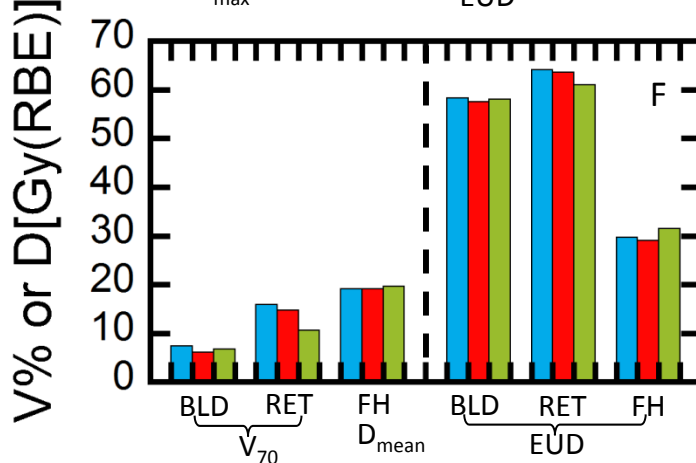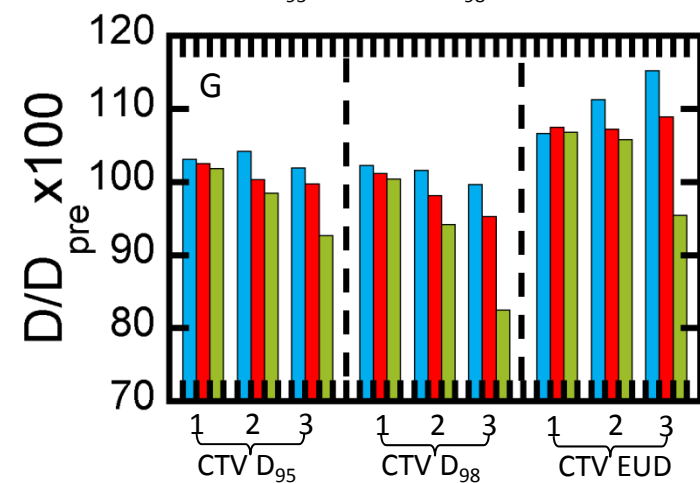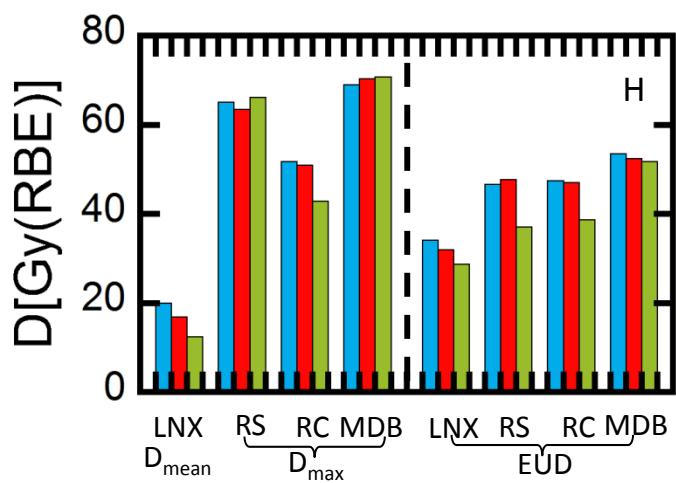

Supplement: MOESM5 [file 9635048]
